# Supplementary material for: [Retracted] Comparative Genomic Characterization of Insulin‐Like Growth Factor Binding Proteins in Cattle and Buffalo
Source: Hindawi journal article supplement (doi:10.1155/2022/5893825), 2022-01-01
Supplement: f1 [file 5893825.f1.docx]

**Supplementary Table 1 (S1).** IGFBP gene family members’ nucleotide and protein sequences accessions from the NCBI database (Genebank accessions)

| **Specie** | **Protein** | **Nucleotide accession** | **Protein accession** |
| --- | --- | --- | --- |
| **Bos taurus (cattle)** | IGFBP1 | NC_037331.1 | NP_776979.2 |
| IGFBP2 | NC_037329.1 | NP_776980.1 |
| IGFBP3 | NC_037331.1 | NP_776981.1 |
| IGFBP4 | NC_037346.1 | NP_776982.1 |
| IGFBP5 | NC_037329.1 | NP_001098797.1 |
| IGFBP6 | NC_037332.1 | NP_001035585.1 |
| IGFBP7 | NC_037333.1 | NP_001095770.1 |
| **Bubalus bubalis (buffalo)** | IGFBP1 | NC_059164.1 | XP_006051341.1 |
| IGFBP2 | NC_059158.1 | XP_025134010.1 |
| IGFBP3 | NC_059164.1 | XP_006051369.2 |
| IGFBP4 | NC_059159.1 | XP_006068690.3 |
| IGFBP5 | NC_059158.1 | NP_001277869.1 |
| IGFBP6 | NC_059160.1 | XP_006046672.1 |
| IGFBP7 | NC_059163.1 | XP_025145786.1 |
| **Capra hircus (goat)** | IGFBP1 | NC_030811.1 | NP_001272692.1 |
| IGFBP2 | NC_030809.1 | NP_001301228.1 |
| IGFBP3 | NC_030811.1 | NP_001301148.1 |
| IGFBP4 | NC_030826.1 | NP_001272607.1 |
| IGFBP5 | NC_030809.1 | NP_001272495.1 |
| IGFBP6 | NC_030812.1 | NP_001301172.1 |
| IGFBP7 | NC_030813.1 | XP_017904988.1 |
| **Ovis aries (sheep)** | IGFBP1 | NC_056057.1 | NP_001138649.1 |
| IGFBP2 | NC_056055.1 | NP_001009436.1 |
| IGFBP3 | NC_056057.1 | NP_001152748.1 |
| IGFBP4 | NC_056064.1 | NP_001127774.1 |
| IGFBP5 | NC_056055.1 | XP_011966279.1 |
| IGFBP6 | NC_056056.1 | NP_001127780.1 |
| IGFBP7 | NC_056059.1 | NP_001138653.1 |

**Supplementary Table S2.** Mutational analysis of IGFBP gene family (IGFBP1-IGFBP7) in cattle and buffalo

|  | **Mutation**  **Position** | | **Specie** | | **Polyphen2** | **Mupro** | **Provean** | **I-Mutant** | **Phd-Snp** | **SIFT** | **SNAP2** | **Predict SNP** | **Meta SNP** | **SNAP** | **Overall effect** |
| --- | --- | --- | --- | --- | --- | --- | --- | --- | --- | --- | --- | --- | --- | --- | --- |
|  | | **IGFBP1** | | | | | | | | | | | | | |
| 1 | **Q19H** | | Buffalo | | BENIGN | DECREASE | Neutral | Decrease | Neutral | Tolerated | Neutral | Neutral | Neutral | NA | Neutral |
| 2 | **L40M** | | Cattle | | Probably Damaging | INCREASE | Neutral | Decrease | Neutral | Tolerated | Effect | Neutral | Neutral | NA | Neutral |
| 3 | **I249V** | | Cattle | | BENIGN | DECREASE | Neutral | Decrease | Neutral | Tolerated | Neutral | Neutral | Neutral | NA | Neutral |
|  | | **IGFBP2** | | | | | | | | | | | | | |
| 1 | **A58S** | | Buffalo | | BENIGN | DECREASE | Neutral | Decrease | Neutral | Tolerated | Neutral | Deleterious | Neutral | NA | Neutral |
| 2 | **H145Q** | | Buffalo | | BENIGN | INCREASE | Neutral | Decrease | Neutral | Tolerated | Neutral | Neutral | Neutral | NA | Neutral |
|  | | **IGFBP3** | | | | | | | | | | | | | |
| 1 | **A17T** | | Cattle | | Unknown | DECREASE | Neutral | Decrease | Neutral | Tolerated | Neutral | Neutral | Neutral | NA | Neutral |
| 2 | **A34T** | | Buffalo | | Unknown | DECREASE | Neutral | Decrease | Neutral | Tolerated | Neutral | Neutral | Neutral | NA | Neutral |
|  |  | | | **AP 132-133 deletion in Cattle** | | | | | | | | | | | |
| 1 | **V156G**  **Buffalo** | | Cattle | | BENIGN | DECREASE | Neutral | Decrease | Neutral | Tolerated | Effect | Neutral | Neutral | NA | Neutral |
| 2 | **V170I**  **Buffalo** | | Cattle | | BENIGN | DECREASE | Neutral | Decrease | Neutral | Tolerated | Neutral | Neutral | Neutral | NA | Neutral |
|  | | **IGFBP4** | | | | | | | | | | | | | |
| 1 | **V7M** | | Cattle | | Unknown | INCREASE | Neutral | Decrease | Neutral | Not Tolerated | Neutral | Neutral | Neutral | NA | Neutral |
| 2 | **A161C** | | Buffalo | | Probably Damaging | DECREASE | Neutral | Decrease | Neutral | Tolerated | Neutral | Neutral | Neutral | NA | Neutral |
| 3 | **P162T** | | Buffalo | | BENIGN | DECREASE | Neutral | Decrease | Neutral | Tolerated | Neutral | Neutral | Neutral | NA | Neutral |
|  | | **IGFBP5** | | | | | | | | | | | | | |
| 1 | **P16S** | | Cattle | | BENIGN | DECREASE | Neutral | Decrease | Neutral | Tolerated | Neutral | Neutral | Neutral | NA | Neutral |
| 2 | **E185K** | | Cattle | | BENIGN | DECREASE | Neutral | Decrease | Neutral | Not Tolerated | Effect | Neutral | Neutral | NA | Neutral |
|  | | **IGFBP6** | | | | | | | | | | | | | |
| 1 | **N147S** | | Buffalo | | BENIGN | DECREASE | Neutral | Decrease | Neutral | Tolerated | Neutral | Neutral | Neutral | NA | Neutral |
| 2 | **A178P** | | Buffalo | | Probably Damaging | DECREASE | Neutral | Increase | Neutral | Tolerated | Neutral | Neutral | Neutral | NA | Neutral |
| 3 | **D212E** | | Cattle | | Probably Damaging | DECREASE | Deleterious | Increase | Neutral | Not Tolerated | Effect | Deleterious | Neutral | NA | Damaging |
| **IGFBP7** | | | | | | | | | | | | | | | |
| 1 | **R95K**  **buffalo** | | BENIGN | | DECREASE | Neutral | Decrease | Neutral | Tolerated | Neutral | Neutral | Neutral | Neutral | NA | Neutral |

**Supplementary Table S3.** Transcription factors binding sites observed in cattle and buffalo

| S**. No** | **Transcription factors** | **No of binding sites in Cattle**  **(*Bos taurus*)** | | | | **No of binding sites in Buffalo (*Bubalus bubalis*)** | | | |
| --- | --- | --- | --- | --- | --- | --- | --- | --- | --- |
| ***IGFBP2*** | ***IGFBP3*** | ***IGFBP5*** | ***IGFBP6*** | ***IGFBP2*** | ***IGFBP3*** | ***IGFBP5*** | ***IGFBP6*** |
| 1 | AHR | 4 | 2 | 2 | 1 | 1 | 0 | 1 | 0 |
| 2 | AHRARNT | 7 | 2 | 4 | 1 | 7 | 4 | 5 | 2 |
| 3 | AML1 | 9 | 2 | 3 | 2 | 2 | 2 | 2 | 0 |
| 4 | AP1 | 17 | 4 | 20 | 1 | 7 | 4 | 17 | 3 |
| 5 | AP1FJ | 2 | 0 | 3 | 0 | 2 | 0 | 3 | 1 |
| 6 | AP2 | 16 | 4 | 13 | 2 | 10 | 5 | 11 | 5 |
| 7 | AP4 | 29 | 6 | 42 | 8 | 17 | 7 | 31 | 0 |
| 8 | ARNT | 1 | 0 | 6 | 0 | 1 | 0 | 4 | 0 |
| 9 | ARP1 | 5 | 3 | 8 | 0 | 6 | 1 | 5 | 1 |
| 10 | ATF | 1 | 0 | 3 | 0 | 3 | 1 | 1 | 0 |
| 11 | BARBIE | 2 | 0 | 2 | 0 | 1 | 0 | 2 | 0 |
| 12 | CAAT | 7 | 3 | 8 | 1 | 1 | 2 | 6 | 0 |
| 13 | CAP | 13 | 2 | 12 | 2 | 14 | 1 | 15 | 1 |
| 14 | CDP | 3 | 0 | 1 | 0 | 1 | 0 | 1 | 1 |
| 15 | CDPCR1 | 2 | 0 | 1 | 0 | 1 | 0 | 3 | 0 |
| 16 | CDPCR3 | 2 | 0 | 2 | 0 | 1 | 0 | 1 | 0 |
| 17 | CDPCR3HD | 2 | 0 | 2 | 0 | 3 | 0 | 2 | 1 |
| 18 | CDXA | 4 | 0 | 3 | 1 | 2 | 0 | 2 | 1 |
| 19 | CEBP | 4 | 1 | 5 | 0 | 2 | 1 | 3 | 0 |
| 20 | CEBPA | 4 | 1 | 2 | 2 | 0 | 1 | 2 | 0 |
| 21 | CEBPB | 4 | 0 | 8 | 1 | 4 | 0 | 2 | 0 |
| 22 | CETS1P54 | 10 | 2 | 20 | 1 | 6 | 1 | 11 | 1 |
| 23 | CHOP | 2 | 0 | 2 | 0 | 2 | 0 | 3 | 0 |
| 24 | CLOX | 2 | 0 | 0 | 0 | 0 | 0 | 0 | 0 |
| 25 | CMYB | 2 | 1 | 3 | 1 | 0 | 1 | 1 | 0 |
| 26 | COMP1 | 5 | 1 | 2 | 1 | 2 | 1 | 2 | 1 |
| 27 | COUP | 0 | 0 | 2 | 0 | 1 | 0 | 0 | 0 |
| 28 | CP2 | 9 | 0 | 7 | 0 | 4 | 0 | 9 | 0 |
| 29 | CREB | 5 | 4 | 24 | 0 | 9 | 4 | 14 | 0 |
| 30 | CREBP1 | 1 | 1 | 7 | 2 | 2 | 0 | 5 | 2 |
| 31 | CREBP1CJUN | 0 | 0 | 1 | 0 | 0 | 0 | 1 | 0 |
| 32 | CREL | 1 | 0 | 6 | 0 | 1 | 0 | 3 | 1 |
| 33 | DELTAEF1 | 3 | 0 | 7 | 0 | 1 | 0 | 4 | 0 |
| 34 | E2 | 10 | 1 | 4 | 0 | 2 | 1 | 2 | 0 |
| 35 | E2F | 2 | 1 | 13 | 1 | 3 | 1 | 12 | 0 |
| 36 | E47 | 6 | 1 | 11 | 4 | 1 | 0 | 10 | 0 |
| 37 | E4BP4 | 4 | 0 | 1 | 2 | 2 | 0 | 1 | 0 |
| 38 | EGR1 | 3 | 1 | 0 | 2 | 3 | 0 | 0 | 0 |
| 39 | EGR2 | 4 | 1 | 3 | 1 | 3 | 0 | 0 | 0 |
| 40 | EGR3 | 4 | 0 | 1 | 0 | 3 | 0 | 0 | 0 |
| 41 | ELK1 | 10 | 2 | 12 | 1 | 5 | 1 | 10 | 1 |
| 42 | ER | 4 | 2 | 4 | 1 | 2 | 1 | 3 | 2 |
| 43 | EVI1 | 23 | 0 | 5 | 6 | 6 | 0 | 0 | 0 |
| 44 | GATA | 3 | 1 | 2 | 1 | 1 | 1 | 1 | 0 |
| 45 | GATA1 | 29 | 1 | 18 | 5 | 21 | 1 | 18 | 3 |
| 46 | GATA2 | 16 | 1 | 6 | 1 | 10 | 0 | 8 | 1 |
| 47 | GATA3 | 6 | 0 | 4 | 1 | 3 | 0 | 2 | 0 |
| 48 | GC | 13 | 3 | 20 | 1 | 9 | 3 | 15 | 0 |
| 49 | GFI1 | 2 | 0 | 0 | 0 | 1 | 0 | 0 | 0 |
| 50 | GR | 2 | 0 | 2 | 0 | 1 | 0 | 2 | 1 |
| 51 | GRE | 3 | 0 | 1 | 0 | 1 | 0 | 0 | 0 |
| 52 | HEN1 | 0 | 0 | 3 | 4 | 0 | 0 | 2 | 0 |
| 53 | HFH1 | 2 | 0 | 0 | 0 | 3 | 0 | 0 | 0 |
| 54 | HFH2 | 2 | 0 | 0 | 0 | 0 | 0 | 0 | 0 |
| 55 | HLF | 3 | 0 | 0 | 2 | 2 | 0 | 0 | 1 |
| 56 | HNF1 | 3 | 0 | 0 | 0 | 2 | 0 | 0 | 0 |
| 57 | HNF3B | 2 | 0 | 0 | 0 | 0 | 0 | 0 | 0 |
| 58 | HNF4 | 2 | 0 | 4 | 0 | 1 | 0 | 3 | 0 |
| 59 | HOX13 | 0 | 1 | 2 | 0 | 0 | 0 | 1 | 0 |
| 60 | HSF1 | 4 | 0 | 11 | 1 | 6 | 0 | 8 | 0 |
| 61 | HSF2 | 6 | 0 | 10 | 0 | 7 | 0 | 9 | 0 |
| 62 | IK1 | 3 | 0 | 4 | 0 | 3 | 0 | 1 | 1 |
| 63 | IK2 | 1 | 0 | 4 | 0 | 1 | 0 | 2 | 1 |
| 64 | IK3 | 2 | 0 | 3 | 0 | 1 | 0 | 3 | 0 |
| 65 | IRF1 | 1 | 0 | 3 | 2 | 1 | 0 | 1 | 2 |
| 66 | IRF2 | 3 | 0 | 3 | 3 | 0 | 0 | 2 | 2 |
| 67 | ISRE | 1 | 0 | 0 | 2 | 2 | 0 | 1 | 2 |
| 68 | LMO2COM | 5 | 1 | 15 | 4 | 5 | 0 | 17 | 0 |
| 69 | LYF1 | 9 | 1 | 4 | 1 | 5 | 1 | 6 | 1 |
| 70 | MAX | 0 | 0 | 4 | 0 | 0 | 0 | 4 | 0 |
| 71 | MEF2 | 2 | 0 | 1 | 0 | 2 | 0 | 0 | 0 |
| 72 | MIF1 | 1 | 1 | 3 | 0 | 0 | 1 | 1 | 0 |
| 73 | MYB | 2 | 0 | 4 | 0 | 3 | 1 | 3 | 0 |
| 74 | MYCMAX | 1 | 2 | 5 | 0 | 0 | 1 | 8 | 0 |
| 75 | MYOD | 11 | 3 | 18 | 4 | 4 | 4 | 22 | 0 |
| 76 | MYOGNF1 | 1 | 0 | 2 | 0 | 1 | 0 | 5 | 0 |
| 77 | MZF1 | 9 | 2 | 16 | 1 | 10 | 2 | 3 | 0 |
| 78 | NF1 | 1 | 1 | 7 | 0 | 0 | 1 | 7 | 0 |
| 79 | NFE2 | 0 | 1 | 2 | 1 | 0 | 1 | 0 | 1 |
| 80 | NFKAPPAB | 1 | 2 | 7 | 0 | 0 | 2 | 3 | 3 |
| 81 | NFKAPPAB50 | 2 | 1 | 2 | 0 | 0 | 1 | 1 | 3 |
| 82 | NFKAPPAB65 | 0 | 0 | 3 | 0 | 0 | 0 | 0 | 3 |
| 83 | NFKB | 1 | 4 | 10 | 1 | 1 | 4 | 4 | 1 |
| 84 | NFY | 5 | 2 | 7 | 0 | 0 | 1 | 5 | 0 |
| 85 | NGFIC | 5 | 2 | 3 | 1 | 7 | 1 | 0 | 0 |
| 86 | NKX25 | 2 | 1 | 2 | 1 | 2 | 1 | 1 | 1 |
| 87 | NMYC | 1 | 4 | 8 | 0 | 1 | 5 | 8 | 0 |
| 88 | NRF2 | 3 | 2 | 9 | 0 | 3 | 2 | 8 | 0 |
| 89 | OCT | 2 | 0 | 0 | 0 | 1 | 0 | 1 | 0 |
| 90 | 1-Oct | 17 | 2 | 11 | 1 | 13 | 1 | 12 | 3 |
| 91 | OLF1 | 5 | 2 | 0 | 0 | 2 | 0 | 1 | 0 |
| 92 | P300 | 5 | 1 | 5 | 1 | 4 | 1 | 1 | 1 |
| 93 | P53 | 10 | 0 | 10 | 2 | 10 | 1 | 13 | 4 |
| 94 | PADS | 4 | 0 | 2 | 0 | 2 | 0 | 2 | 0 |
| 95 | PAX2 | 3 | 1 | 2 | 1 | 0 | 1 | 0 | 1 |
| 96 | PAX5 | 3 | 1 | 6 | 0 | 3 | 2 | 4 | 0 |
| 97 | PBX1 | 4 | 0 | 0 | 0 | 0 | 0 | 0 | 0 |
| 98 | POLY | 3 | 0 | 4 | 1 | 1 | 0 | 2 | 0 |
| 99 | PPARA | 0 | 0 | 1 | 0 | 0 | 0 | 1 | 0 |
| 100 | R | 1 | 0 | 1 | 0 | 0 | 0 | 0 | 0 |
| 101 | RFX1 | 3 | 3 | 5 | 0 | 5 | 2 | 2 | 1 |
| 102 | RORA1 | 1 | 0 | 3 | 1 | 1 | 0 | 1 | 2 |
| 103 | RORA2 | 1 | 0 | 0 | 2 | 1 | 0 | 0 | 2 |
| 104 | RREB1 | 3 | 4 | 4 | 0 | 1 | 3 | 1 | 0 |
| 105 | S8 | 4 | 0 | 2 | 0 | 2 | 0 | 0 | 0 |
| 106 | SEF1 | 0 | 1 | 1 | 1 | 0 | 1 | 1 | 0 |
| 107 | SOX5 | 7 | 0 | 2 | 0 | 5 | 0 | 2 | 0 |
| 108 | SP1 | 23 | 10 | 29 | 4 | 19 | 10 | 26 | 2 |
| 109 | SREBP1 | 1 | 0 | 5 | 1 | 2 | 1 | 5 | 0 |
| 110 | SRF | 1 | 0 | 7 | 3 | 0 | 0 | 5 | 1 |
| 111 | SRY | 16 | 0 | 10 | 3 | 13 | 0 | 6 | 2 |
| 112 | STAF | 7 | 2 | 9 | 0 | 4 | 1 | 5 | 0 |
| 113 | STAT | 3 | 1 | 2 | 0 | 2 | 1 | 4 | 0 |
| 114 | STAT1 | 0 | 0 | 1 | 0 | 0 | 0 | 1 | 0 |
| 115 | STAT3 | 0 | 0 | 2 | 0 | 0 | 0 | 0 | 0 |
| 116 | T3R | 4 | 2 | 3 | 0 | 0 | 0 | 3 | 1 |
| 117 | TAL1ALPHAE47 | 1 | 0 | 3 | 1 | 1 | 1 | 3 | 0 |
| 118 | TAL1BETAE47 | 1 | 0 | 0 | 0 | 1 | 0 | 3 | 0 |
| 119 | TAL1BETAITF2 | 2 | 0 | 0 | 0 | 1 | 0 | 0 | 0 |
| 120 | TATA | 0 | 0 | 4 | 0 | 1 | 0 | 3 | 0 |
| 121 | TAXCREB | 10 | 4 | 5 | 2 | 8 | 5 | 4 | 0 |
| 122 | TH1E47 | 4 | 1 | 5 | 0 | 0 | 1 | 4 | 1 |
| 123 | TST1 | 1 | 0 | 3 | 0 | 2 | 0 | 2 | 0 |
| 124 | USF | 22 | 12 | 41 | 1 | 8 | 12 | 36 | 4 |
| 125 | VBP | 1 | 0 | 0 | 3 | 1 | 0 | 0 | 2 |
| 126 | VMAF | 1 | 1 | 0 | 0 | 1 | 1 | 1 | 0 |
| 127 | VMYB | 6 | 2 | 10 | 3 | 7 | 2 | 12 | 3 |
| 128 | XBP1 | 0 | 0 | 3 | 0 | 0 | 0 | 2 | 0 |
| 129 | XFD1 | 1 | 0 | 0 | 0 | 1 | 0 | 0 | 0 |
| 130 | XFD2 | 1 | 0 | 0 | 0 | 0 | 0 | 0 | 0 |
| 131 | XFD3 | 4 | 0 | 0 | 0 | 3 | 0 | 0 | 0 |
| 132 | YY1 | 6 | 0 | 5 | 1 | 3 | 0 | 9 | 3 |
| 133 | ZID | 0 | 1 | 4 | 0 | 0 | 0 | 4 | 1 |
